# Supplementary material for: Molecular pixelation: spatial proteomics of single cells by sequencing
Source: PubMed Central journal article supplement (PMC11166577; doi:10.1038/s41592-024-02268-9), 2024-05-08
Supplement: 41592_2024_2268_MOESM2_ESM.pdf [file 41592_2024_2268_MOESM2_ESM.pdf]

## Reporting Summary

Nature Portfolio wishes to improve the reproducibility of the work that we publish. This form provides structure for consistency and transparency in reporting. For further information on Nature Portfolio policies, see our [Editorial Policies](#) and the [Editorial Policy Checklist](#).

### Statistics

For all statistical analyses, confirm that the following items are present in the figure legend, table legend, main text, or Methods section.

n/a Confirmed

- The exact sample size ( $n$ ) for each experimental group/condition, given as a discrete number and unit of measurement
- A statement on whether measurements were taken from distinct samples or whether the same sample was measured repeatedly
- The statistical test(s) used AND whether they are one- or two-sided  
*Only common tests should be described solely by name; describe more complex techniques in the Methods section.*
- A description of all covariates tested
- A description of any assumptions or corrections, such as tests of normality and adjustment for multiple comparisons
- A full description of the statistical parameters including central tendency (e.g. means) or other basic estimates (e.g. regression coefficient) AND variation (e.g. standard deviation) or associated estimates of uncertainty (e.g. confidence intervals)
- For null hypothesis testing, the test statistic (e.g.  $F$ ,  $t$ ,  $r$ ) with confidence intervals, effect sizes, degrees of freedom and  $P$  value noted  
*Give  $P$  values as exact values whenever suitable.*
- For Bayesian analysis, information on the choice of priors and Markov chain Monte Carlo settings
- For hierarchical and complex designs, identification of the appropriate level for tests and full reporting of outcomes
- Estimates of effect sizes (e.g. Cohen's  $d$ , Pearson's  $r$ ), indicating how they were calculated

*Our web collection on [statistics for biologists](#) contains articles on many of the points above.*

### Software and code

Policy information about [availability of computer code](#)

Data collection

Data analysis

All analysis code can be found at <https://github.com/PixelgenTechnologies/pixelgen-MPX-paper>

For manuscripts utilizing custom algorithms or software that are central to the research but not yet described in published literature, software must be made available to editors and reviewers. We strongly encourage code deposition in a community repository (e.g. GitHub). See the Nature Portfolio [guidelines for submitting code & software](#) for further information.

## Data

Policy information about [availability of data](#)

All manuscripts must include a [data availability statement](#). This statement should provide the following information, where applicable:

- Accession codes, unique identifiers, or web links for publicly available datasets
- A description of any restrictions on data availability
- For clinical datasets or third party data, please ensure that the statement adheres to our [policy](#)

The MPX raw read data and Pixelator 0.12 processed output can be downloaded from Pixelgen Technologies (<https://software.pixelgen.com/datasets/>). Datasets are granted under a Creative Commons Attribution (<https://creativecommons.org/licenses/by/4.0/legalcode>) license.

## Human research participants

Policy information about [studies involving human research participants and Sex and Gender in Research](#).

|                             |                                                                                                                                                                                      |
|-----------------------------|--------------------------------------------------------------------------------------------------------------------------------------------------------------------------------------|
| Reporting on sex and gender | Data on neither sex nor gender were collected.                                                                                                                                       |
| Population characteristics  | no population studies were done                                                                                                                                                      |
| Recruitment                 | All PBMC samples were purchased from a Karolinska Hospital blood bank drawn from healthy volunteers with informed consent and withheld sample identity or other medical information. |
| Ethics oversight            | Identify the organization(s) that approved the study protocol.                                                                                                                       |

Note that full information on the approval of the study protocol must also be provided in the manuscript.

## Field-specific reporting

Please select the one below that is the best fit for your research. If you are not sure, read the appropriate sections before making your selection.

Life sciences       Behavioural & social sciences       Ecological, evolutionary & environmental sciences

For a reference copy of the document with all sections, see [nature.com/documents/nr-reporting-summary-flat.pdf](https://nature.com/documents/nr-reporting-summary-flat.pdf)

## Life sciences study design

All studies must disclose on these points even when the disclosure is negative.

|                 |                                                                                                                                                                                                                                                                                                                                                                                                                               |
|-----------------|-------------------------------------------------------------------------------------------------------------------------------------------------------------------------------------------------------------------------------------------------------------------------------------------------------------------------------------------------------------------------------------------------------------------------------|
| Sample size     | Since the study was primarily focused on method development, no calculations were carried out to determine the size of the biological samples. Previous experiments indicated that 500-1000 cells were sufficient to gain reproducible statistical significance in both abundance and spatial metrics for primary PBMC cell populations. For this methods development context, this range of cell input was therefore chosen. |
| Data exclusions | Cells were filtered to remove cells with few detected antibodies, and suspected antibody aggregates as outlined in Methods.                                                                                                                                                                                                                                                                                                   |
| Replication     | PBMC samples were processed in duplicates and cells were aggregated from both replicates for analysis. All replications were successful.                                                                                                                                                                                                                                                                                      |
| Randomization   | Samples were randomly downsampled in silico for statistical tests.                                                                                                                                                                                                                                                                                                                                                            |
| Blinding        | Blinding was not performed as this work is methods development.                                                                                                                                                                                                                                                                                                                                                               |

## Reporting for specific materials, systems and methods

We require information from authors about some types of materials, experimental systems and methods used in many studies. Here, indicate whether each material, system or method listed is relevant to your study. If you are not sure if a list item applies to your research, read the appropriate section before selecting a response.

## Materials &amp; experimental systems

## Methods

| n/a                                 | Involvement                                               |
|-------------------------------------|-----------------------------------------------------------|
| <input type="checkbox"/>            | <input checked="" type="checkbox"/> Antibodies            |
| <input type="checkbox"/>            | <input checked="" type="checkbox"/> Eukaryotic cell lines |
| <input checked="" type="checkbox"/> | <input type="checkbox"/> Palaeontology and archaeology    |
| <input checked="" type="checkbox"/> | <input type="checkbox"/> Animals and other organisms      |
| <input checked="" type="checkbox"/> | <input type="checkbox"/> Clinical data                    |
| <input checked="" type="checkbox"/> | <input type="checkbox"/> Dual use research of concern     |

| n/a                                 | Involvement                                     |
|-------------------------------------|-------------------------------------------------|
| <input checked="" type="checkbox"/> | <input type="checkbox"/> ChIP-seq               |
| <input checked="" type="checkbox"/> | <input type="checkbox"/> Flow cytometry         |
| <input checked="" type="checkbox"/> | <input type="checkbox"/> MRI-based neuroimaging |

## Antibodies

Antibodies used

All antibodies purchased from Antibodies-online and used at 5ug/ml)

B2M B2M-02  
 BAFFR 11C1  
 CD102 CBR-IC2-2  
 CD11a HI111  
 CD11b ICRF44  
 CD11c Bu15  
 CD127 A019D5  
 CD137 4B4-1  
 CD14 61D3  
 CD150 A12 (7D4)  
 CD152 BNI3  
 CD154 24-31  
 CD158 NKVFS1  
 CD16 3G8  
 CD161 HP-3G10  
 CD162 KPL-1  
 CD163 GHI-61  
 CD18 TS1-18  
 CD19 SJ25-C1  
 CD197 G043H7  
 CD1d 51-1  
 CD2 TS1-8  
 CD20 2H7  
 CD200 OX-104  
 CD22 S-HCL-1  
 CD229 HLy9-25  
 CD244 C1.7  
 CD25 BC96  
 CD26 BA5b  
 CD27 LT27  
 CD274 2A3  
 CD278 C398-4A  
 CD279 EH12-2H7  
 CD29 3B6  
 CD314 1D11  
 CD32 FUN2  
 CD33 WM53  
 CD337 P30-15  
 CD35 E11  
 CD36 5-271  
 CD37 IPO-24  
 CD38 HIT2  
 CD3E UCHT1  
 CD4 OKT4  
 CD40 C40-1605  
 CD41 A2A9-6  
 CD43 MEM-59  
 CD44 F10-44-2  
 CD45 HI30  
 CD45RA HI100  
 CD45RB MEM55  
 CD47 B6H12-2  
 CD48 MEM-102  
 CD49D 9F10  
 CD5 UCHT2  
 CD50 MEM-171  
 CD52 HI186

CD53 MEM-53  
 CD54 1H4  
 CD55 F4-29D9  
 CD59 MEM-43  
 CD62P AK4  
 CD64 10.1  
 CD69 FN50  
 CD7 4H9  
 CD71 CY1G4  
 CD72 3F3  
 CD8 SK1  
 CD82 C33  
 CD84 CD84-1-21  
 CD86 IT2-2  
 CD9 MEM-61  
 HLA-ABC W6-32  
 HLA-DR L243  
 SIGLEC S7-7  
 TCRb MEM-262  
 ACTB 137CT26-1-1  
 mIgG1 MOPC-21  
 mIgG2a MOPC-173  
 mIgG2b MPC-11

#### Validation

All antibodies are mouse monoclonal and validated by the supplier antibodies-online.com for use in flow cytometry by their specific binding to respective target proteins found on a certain cell type in PBMC. Each antibody was revalidated by the authors in the same way on PFA fixed cells.

## Eukaryotic cell lines

Policy information about [cell lines and Sex and Gender in Research](#)

#### Cell line source(s)

Purchased (Raji, Jurkat, Daudi) from DSMZ ([www.dsmz.de](http://www.dsmz.de))

#### Authentication

All cell lines used (Raji, Jurkat, Daudi) have been verified by flow cytometry.

#### Mycoplasma contamination

All cell lines (Raji, Jurkat, Daudi) have tested negative for mycoplasma contamination prior to the experiments.

#### Commonly misidentified lines (See [ICLAC](#) register)

None of the cell lines used (Raji, Jurkat, Daudi) are commonly misidentified according to the ICLAC register.
